# Supplementary material for: Impact of Polypyrrole Functionalization on the Anodic Performance of Boron Nitride Nanosheets: Insights From First-Principles Calculations
Source: PubMed Central journal article supplement (PMC8113678; doi:10.3389/fchem.2021.670833), 2021-04-28
Supplement: Data_Sheet_1.pdf [file Data_Sheet_1.pdf]

## Supporting Information

### **Impact of polypyrrole functionalization on the anodic performance of boron nitride nanosheets: insights from first-principles calculations**

Chidera C. Nnadike<sup>a</sup>, Ismail Abdulazeez<sup>a</sup>, Muhammad Haroon<sup>a</sup>, Qing Peng<sup>b,c</sup>, Almaz Jalilov<sup>a</sup>, Abdulaziz Al-Saadi<sup>a,\*</sup>

<sup>a</sup>Chemistry Department, King Fahd University of Petroleum and Minerals, Dhahran 31261, Saudi Arabia

<sup>b</sup>Physics Department, King Fahd University of Petroleum and Minerals, Dhahran 31261, Saudi Arabia

<sup>c</sup>K.A CARE Energy Research & Innovations Center at Dhahran, Dhahran 31261, Saudi Arabia

\* *Corresponding author: Dr. Abdulaziz Al-Saadi ([asaadi@kfupm.edu.sa](mailto:asaadi@kfupm.edu.sa))*

#### **Contents**

- 1. Density of states of the metal atoms/ions adsorbed onto BNNS.**
- 2. Density of states of metal atoms/ions adsorbed onto PP-BNNS.**
- 3. HOMO-LUMO maps of the metal atoms/ions on BNNS.**
- 4. HOMO-LUMO maps of the metal atoms/ions on PP-BNNS.**
- 5. Optimized structural cross-sections of the metal atoms/ions onto BNNS.**
- 6. Adsorption energies of the metal atoms/ions on BNNS and PP-BNNS.**

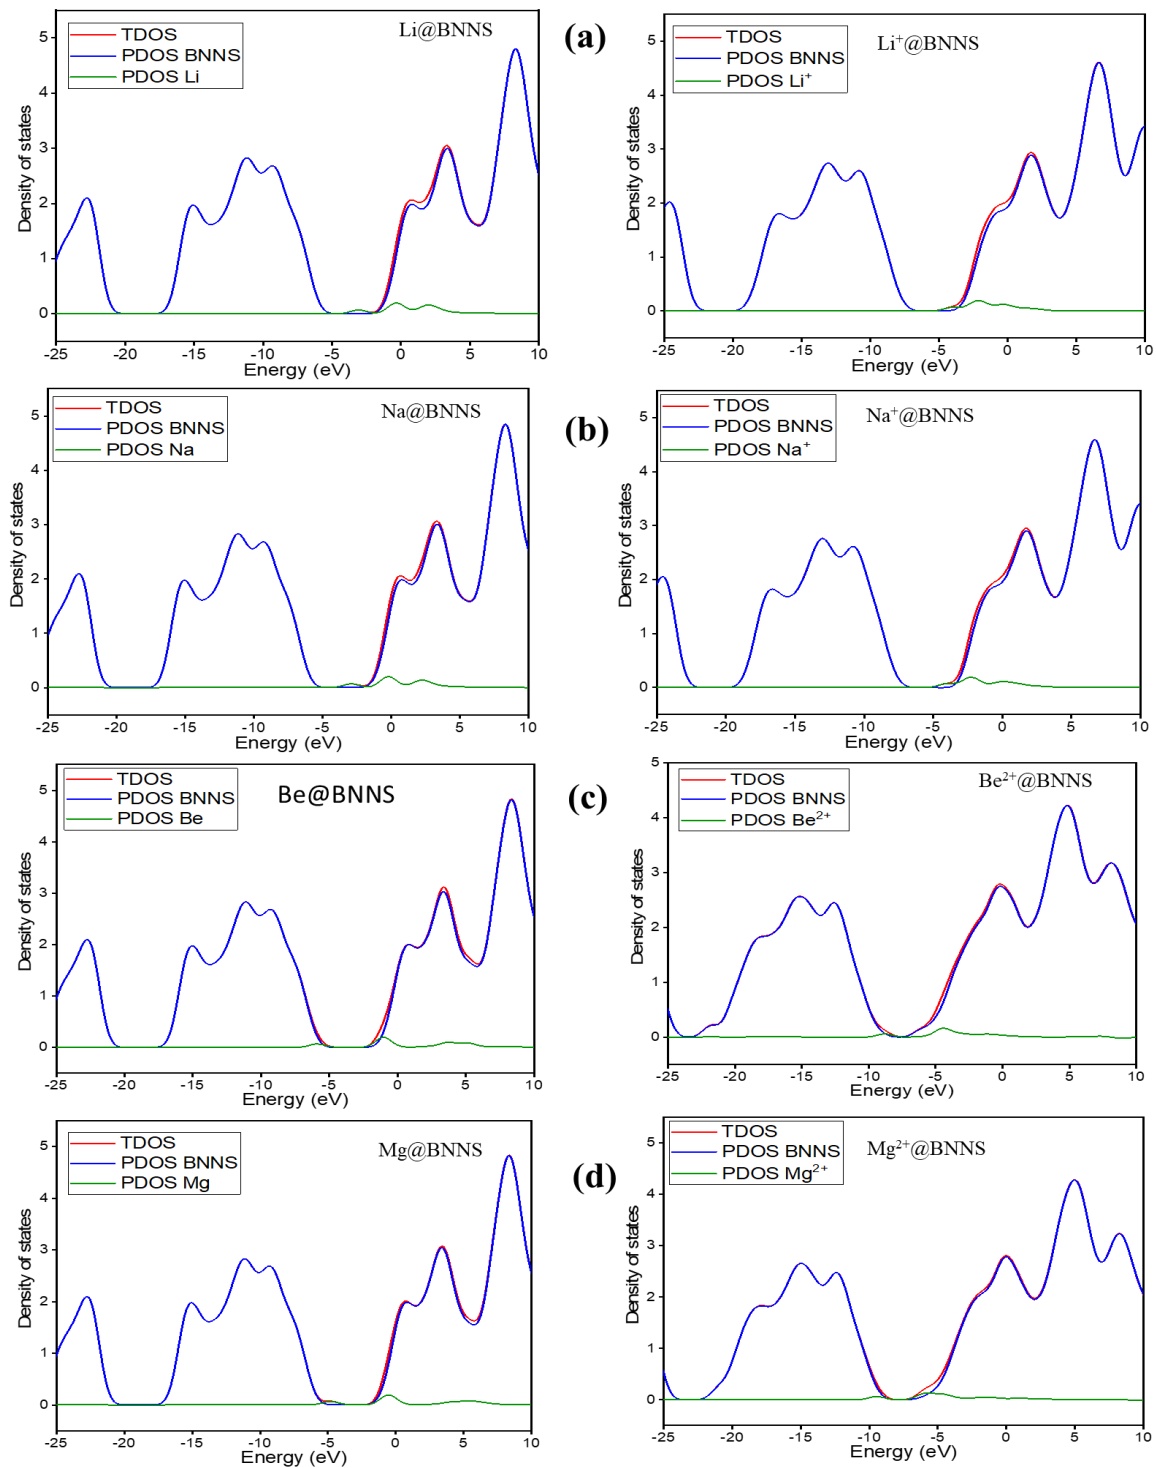

**Figure S1:** Density of States of the metal atoms and ions adsorbed onto the BNNS. It shows the total and partial state of the complexes and/or their components.

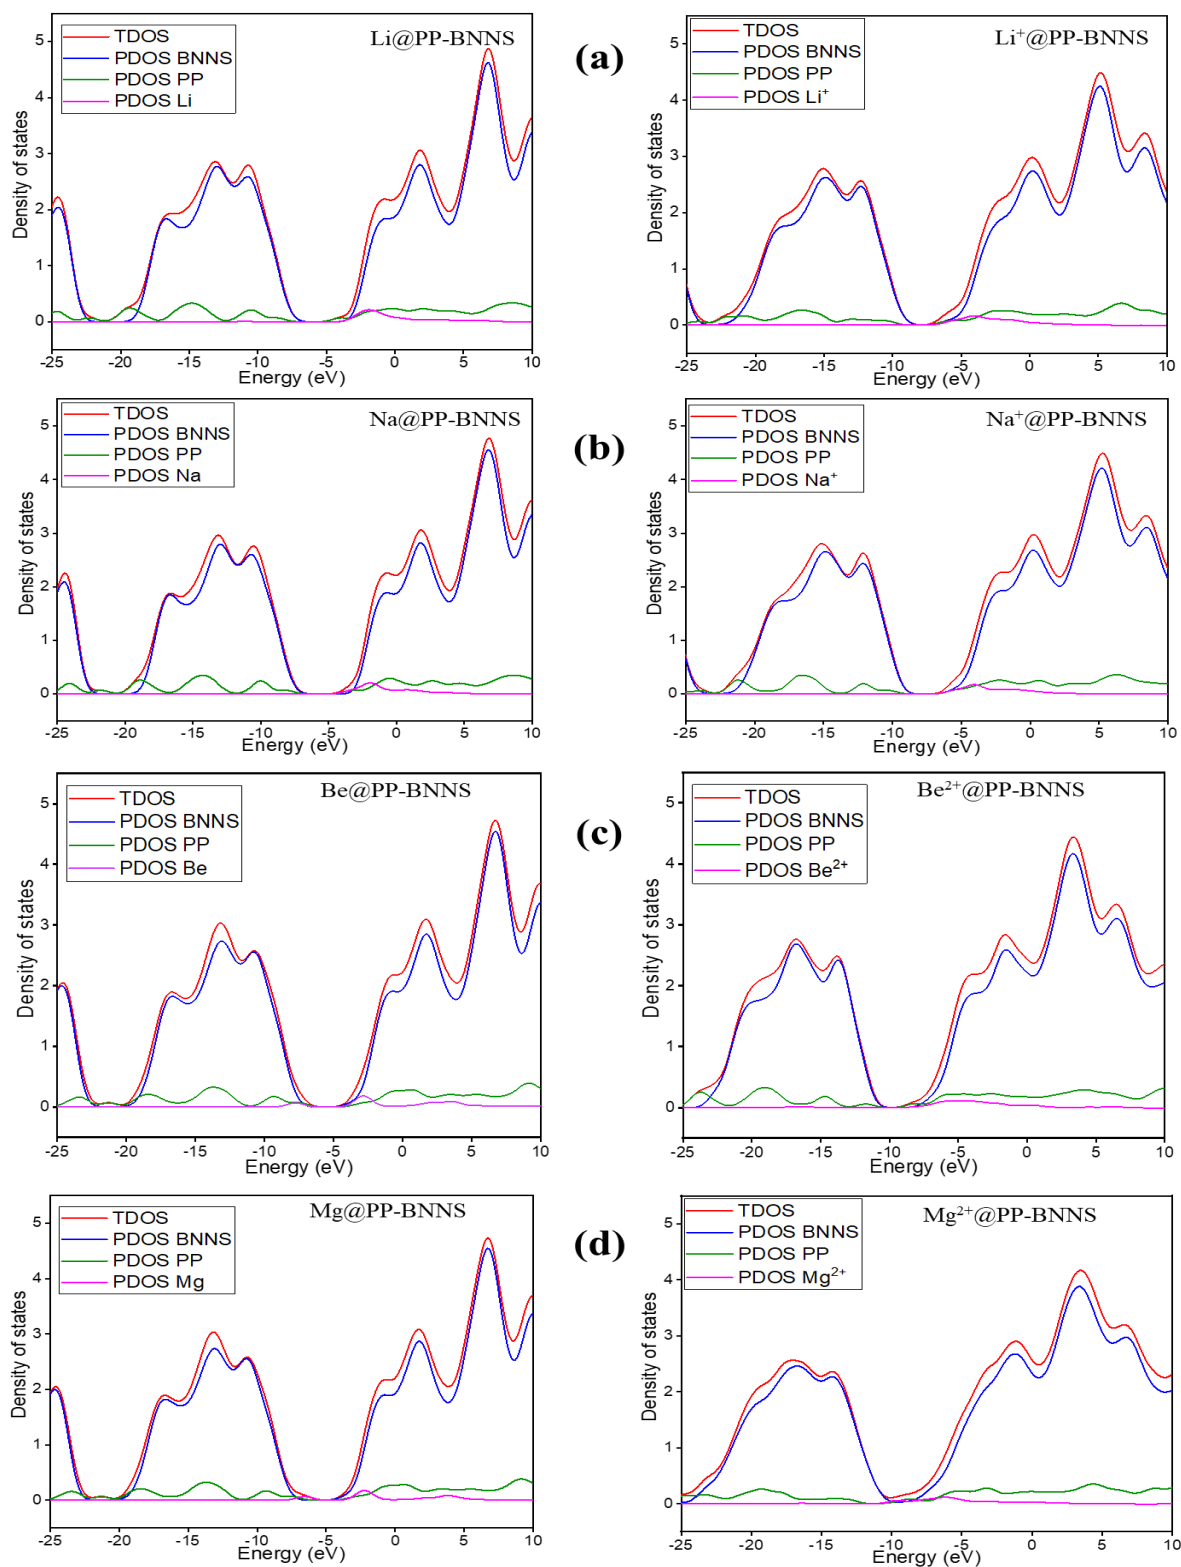

**Figure S2:** Density of States of the metal atoms and ions adsorbed onto the PP-BNNS. It shows the total and partial densities of the state of the complexes and/or their components.

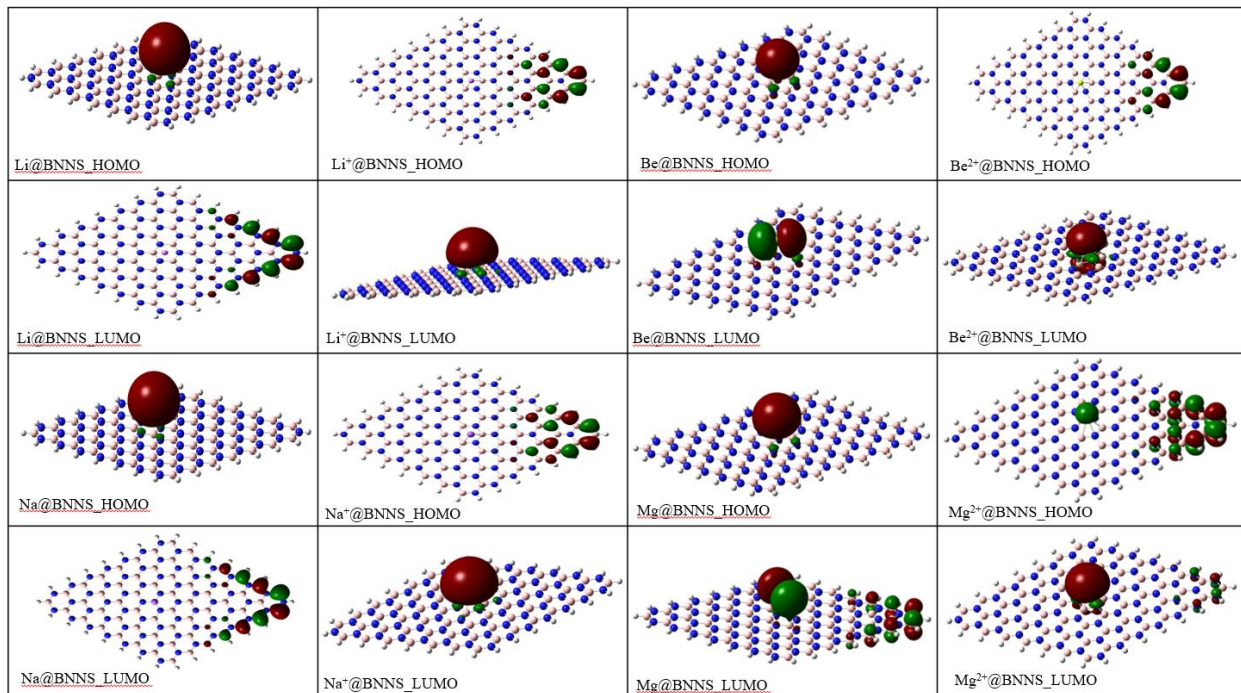

**Figure S3:** The HOMO and LUMO maps of the metal atoms and/or ions adsorbed onto the BNNS ( $M/M^{n+}@BNNS$ ).

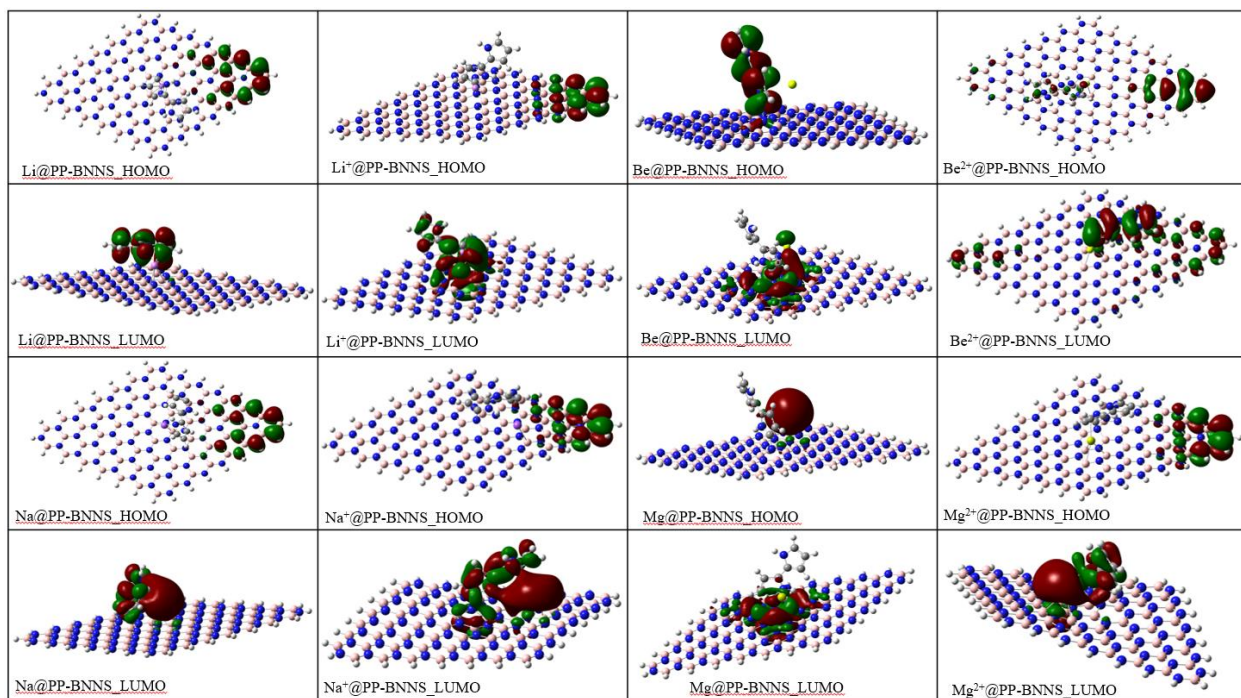

**Figure S4:** The HOMO and LUMO maps of the metal atoms and/or ions adsorbed onto the PP-BNNS ( $M/M^{n+}@PP-BNNS$ ).

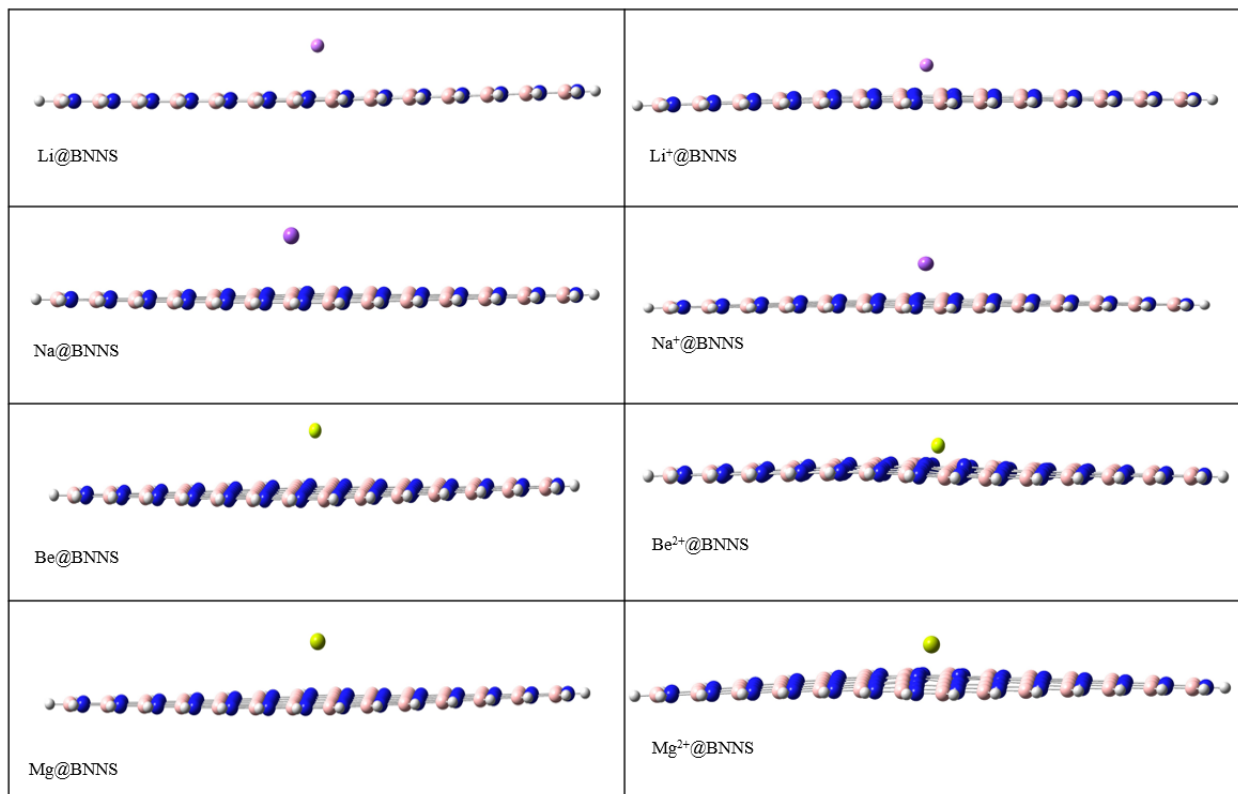

**Figure S5:** Optimized structural cross-section of (a) Li@BNNS, (b) Na@BNNS, (c) Be@BNNS, (d) Mg@BNNS, (e) Li<sup>+</sup>@BNNS, (f) Na<sup>+</sup>@BNNS, (g) Be<sup>2+</sup>@BNNS, and (h) Mg<sup>2+</sup>@BNNS complexes showing the distance between the M/M<sup>n+</sup> and the BNNS. It can be seen that the distance is shorter for M<sup>n+</sup>@BNNS than M@BNNS due to strong adsorption.

**Table S1:** Adsorption energies of metal atoms and ions on BNNS and PP-BNNS complexes

|                           | $E_{\text{HOMO}}$ (eV) | $E_{\text{LUMO}}$ (eV) | $E_g$ (eV) | $\% \Delta E_g$ | $E_{\text{ad}}$ (kcal/mol) |
|---------------------------|------------------------|------------------------|------------|-----------------|----------------------------|
| BNNS                      | -6.449                 | -0.639                 | 5.809      | -               | -                          |
| PP-BNNS                   | -7.380                 | -3.479                 | 3.901      | -32.846         | -542.71                    |
| Li <sup>+</sup> @BNNS     | -7.979                 | -4.065                 | 3.914      | -32.622         | -41.12                     |
| Li@BNNS                   | -3.070                 | -0.662                 | 2.409      | -58.530         | -5.45                      |
| Na <sup>+</sup> @BNNS     | -7.953                 | -3.994                 | 3.959      | -31.847         | -25.08                     |
| Na@BNNS                   | -2.906                 | -0.655                 | 2.251      | -61.250         | -1.82                      |
| Be <sup>2+</sup> @BNNS    | -9.465                 | -8.815                 | 0.650      | -88.810         | -308.73                    |
| Be@BNNS                   | -5.877                 | -1.109                 | 4.768      | -17.920         | -0.79                      |
| Mg <sup>2+</sup> @BNNS    | -9.695                 | -9.456                 | 0.239      | -95.886         | -173.83                    |
| Mg@BNNS                   | -4.801                 | -0.654                 | 4.147      | -28.611         | -1.57                      |
| Li <sup>+</sup> @PP-BNNS  | -9.500                 | -6.318                 | 3.182      | -18.431         | -1.55                      |
| Li@PP-BNNS                | -8.014                 | -3.975                 | 4.038      | 3.512           | -49.17                     |
| Na <sup>+</sup> @PP-BNNS  | -9.787                 | -5.548                 | 4.240      | 8.690           | -8.57                      |
| Na@PP-BNNS                | -8.037                 | -3.444                 | 4.594      | 17.765          | -40.24                     |
| Be <sup>2+</sup> @PP-BNNS | -11.761                | -11.573                | 0.188      | -95.181         | -282.29                    |
| Be@PP-BNNS                | -7.446                 | -3.539                 | 3.907      | 0.154           | -0.210                     |
| Mg <sup>2+</sup> @PP-BNNS | -10.886                | -9.685                 | 1.201      | -69.213         | -106.99                    |
| Mg@PP-BNNS                | -6.592                 | -3.518                 | 3.074      | -21.120         | -2.69                      |
